# Supplementary material for: Deficiency of the frontotemporal dementia gene GRN results in gangliosidosis
Source: PubMed Central journal article supplement (PMC9546883; doi:10.1038/s41467-022-33500-9), 2022-10-07
Supplement: 41467_2022_33500_MOESM3_ESM.pdf [file 41467_2022_33500_MOESM3_ESM.pdf]

## Description of Additional Supplementary Files

### File name: Supplementary Data 1

Description: Comparative lipidomics analyses of mouse brain and kidney samples from GRN<sup>+/+</sup>, GRN<sup>+/R493X</sup>, GRN<sup>R493X/R493X</sup>

### File name: Supplementary Data 2

Description: Comparative lipidomics analyses of human brain samples from control, FTD-TDP43-A(sporadic-non-GRN), FTD-TDP43-A(GRN)

### File name: Supplementary Data 3

Description: Comparative lipidomics analyses of HeLa cells from GRN<sup>+/+</sup>, GRN<sup>-/-</sup>, GRN<sup>-/-</sup> + addback

### File name: Supplementary Data 4

Description: Quantitative proteomics analyses of HeLa cells from GRN<sup>+/+</sup>, GRN<sup>-/-</sup>, GRN<sup>-/-</sup> + addback

### File name: Supplementary Data 5

Description: Quantitative proteomics analyses of HeLa lysosomes from GRN<sup>+/+</sup>, GRN<sup>-/-</sup>

### File name: Supplementary Data 6

Description: Quantitative proteomics analyses of mouse brain samples from GRN<sup>+/+</sup>, GRN<sup>+/R493X</sup>, GRN<sup>R493X/R493X</sup>, GRN<sup>+/-</sup>, GRN<sup>-/-</sup>

### File name: Supplementary Data 7

Description: Genotype, sex, and clinical description of human brain samples
